# Supplementary material for: A novel mechanism of the cachexia-promoting action of chemotherapy drugs fluorouracil and cisplatin
Source: Research Square preprint supplement (doi:10.21203/rs.3.rs-5806256/v1), 2025-02-18
Supplement: Supplementary file 1 [file ea35f1c77f1e44585ca78af4.pdf]

Corresponding author(s):

Last updated by author(s): YYYY-MM-DD

## Reporting Summary

Nature Portfolio wishes to improve the reproducibility of the work that we publish. This form provides structure for consistency and transparency in reporting. For further information on Nature Portfolio policies, see our [Editorial Policies](#) and the [Editorial Policy Checklist](#).

### Statistics

For all statistical analyses, confirm that the following items are present in the figure legend, table legend, main text, or Methods section.

n/a Confirmed

- |                                     |                                     |                                                                                                                                                                                                                                                            |
|-------------------------------------|-------------------------------------|------------------------------------------------------------------------------------------------------------------------------------------------------------------------------------------------------------------------------------------------------------|
| <input type="checkbox"/>            | <input checked="" type="checkbox"/> | The exact sample size ( $n$ ) for each experimental group/condition, given as a discrete number and unit of measurement                                                                                                                                    |
| <input type="checkbox"/>            | <input checked="" type="checkbox"/> | A statement on whether measurements were taken from distinct samples or whether the same sample was measured repeatedly                                                                                                                                    |
| <input type="checkbox"/>            | <input checked="" type="checkbox"/> | The statistical test(s) used AND whether they are one- or two-sided<br><i>Only common tests should be described solely by name; describe more complex techniques in the Methods section.</i>                                                               |
| <input checked="" type="checkbox"/> | <input type="checkbox"/>            | A description of all covariates tested                                                                                                                                                                                                                     |
| <input type="checkbox"/>            | <input checked="" type="checkbox"/> | A description of any assumptions or corrections, such as tests of normality and adjustment for multiple comparisons                                                                                                                                        |
| <input type="checkbox"/>            | <input checked="" type="checkbox"/> | A full description of the statistical parameters including central tendency (e.g. means) or other basic estimates (e.g. regression coefficient) AND variation (e.g. standard deviation) or associated estimates of uncertainty (e.g. confidence intervals) |
| <input type="checkbox"/>            | <input checked="" type="checkbox"/> | For null hypothesis testing, the test statistic (e.g. $F$ , $t$ , $r$ ) with confidence intervals, effect sizes, degrees of freedom and $P$ value noted<br><i>Give <math>P</math> values as exact values whenever suitable.</i>                            |
| <input checked="" type="checkbox"/> | <input type="checkbox"/>            | For Bayesian analysis, information on the choice of priors and Markov chain Monte Carlo settings                                                                                                                                                           |
| <input checked="" type="checkbox"/> | <input type="checkbox"/>            | For hierarchical and complex designs, identification of the appropriate level for tests and full reporting of outcomes                                                                                                                                     |
| <input checked="" type="checkbox"/> | <input type="checkbox"/>            | Estimates of effect sizes (e.g. Cohen's $d$ , Pearson's $r$ ), indicating how they were calculated                                                                                                                                                         |

Our web collection on [statistics for biologists](#) contains articles on many of the points above.

### Software and code

Policy information about [availability of computer code](#)

Data collection

No software was used for data collection.

Data analysis

SigmaStat software (Systat Software) was used

For manuscripts utilizing custom algorithms or software that are central to the research but not yet described in published literature, software must be made available to editors and reviewers. We strongly encourage code deposition in a community repository (e.g. GitHub). See the Nature Portfolio [guidelines for submitting code & software](#) for further information.

### Data

Policy information about [availability of data](#)

All manuscripts must include a [data availability statement](#). This statement should provide the following information, where applicable:

- Accession codes, unique identifiers, or web links for publicly available datasets
- A description of any restrictions on data availability
- For clinical datasets or third party data, please ensure that the statement adheres to our [policy](#)

All data are available within the article and Supplementary files, or available from corresponding authors on reasonable request.

## Research involving human participants, their data, or biological material

Policy information about studies with [human participants or human data](#). See also policy information about [sex, gender \(identity/presentation\), and sexual orientation](#) and [race, ethnicity and racism](#).

### Reporting on sex and gender

Use the terms *sex* (biological attribute) and *gender* (shaped by social and cultural circumstances) carefully in order to avoid confusing both terms. Indicate if findings apply to only one sex or gender; describe whether sex and gender were considered in study design; whether sex and/or gender was determined based on self-reporting or assigned and methods used. Provide in the source data disaggregated sex and gender data, where this information has been collected, and if consent has been obtained for sharing of individual-level data; provide overall numbers in this Reporting Summary. Please state if this information has not been collected. Report sex- and gender-based analyses where performed, justify reasons for lack of sex- and gender-based analysis.

### Reporting on race, ethnicity, or other socially relevant groupings

Please specify the socially constructed or socially relevant categorization variable(s) used in your manuscript and explain why they were used. Please note that such variables should not be used as proxies for other socially constructed/relevant variables (for example, race or ethnicity should not be used as a proxy for socioeconomic status). Provide clear definitions of the relevant terms used, how they were provided (by the participants/respondents, the researchers, or third parties), and the method(s) used to classify people into the different categories (e.g. self-report, census or administrative data, social media data, etc.) Please provide details about how you controlled for confounding variables in your analyses.

### Population characteristics

Describe the covariate-relevant population characteristics of the human research participants (e.g. age, genotypic information, past and current diagnosis and treatment categories). If you filled out the behavioural & social sciences study design questions and have nothing to add here, write "See above."

### Recruitment

Describe how participants were recruited. Outline any potential self-selection bias or other biases that may be present and how these are likely to impact results.

### Ethics oversight

Identify the organization(s) that approved the study protocol.

Note that full information on the approval of the study protocol must also be provided in the manuscript.

## Field-specific reporting

Please select the one below that is the best fit for your research. If you are not sure, read the appropriate sections before making your selection.

☒ Life sciences ☐ Behavioural & social sciences ☐ Ecological, evolutionary & environmental sciences

For a reference copy of the document with all sections, see [nature.com/documents/nr-reporting-summary-flat.pdf](https://www.nature.com/documents/nr-reporting-summary-flat.pdf)

## Life sciences study design

All studies must disclose on these points even when the disclosure is negative.

|                 |                                                                                                                                                                                                                                                                                  |
|-----------------|----------------------------------------------------------------------------------------------------------------------------------------------------------------------------------------------------------------------------------------------------------------------------------|
| Sample size     | We selected sample sizes based on commonly accepted practices and our previous studies, which indicated that the chosen sizes would be sufficient to detect reproducible differences between conditions. Our sample sizes are consistent with those typically used in the field. |
| Data exclusions | None                                                                                                                                                                                                                                                                             |
| Replication     | Data were obtained in at least three biologically independent replicates and the number of animals were described in corresponding figure legends.                                                                                                                               |
| Randomization   | Mice were randomized based on body weight and age in such a way that the groups were homogeneous before the start of the interventions.                                                                                                                                          |
| Blinding        | Blinding was not applied to our study.                                                                                                                                                                                                                                           |

## Reporting for specific materials, systems and methods

We require information from authors about some types of materials, experimental systems and methods used in many studies. Here, indicate whether each material, system or method listed is relevant to your study. If you are not sure if a list item applies to your research, read the appropriate section before selecting a response.

## Materials &amp; experimental systems

|                                     |                                                                 |
|-------------------------------------|-----------------------------------------------------------------|
| n/a                                 | Involved in the study                                           |
| <input type="checkbox"/>            | <input checked="" type="checkbox"/> Antibodies                  |
| <input type="checkbox"/>            | <input checked="" type="checkbox"/> Eukaryotic cell lines       |
| <input checked="" type="checkbox"/> | <input type="checkbox"/> Palaeontology and archaeology          |
| <input type="checkbox"/>            | <input checked="" type="checkbox"/> Animals and other organisms |
| <input checked="" type="checkbox"/> | <input type="checkbox"/> Clinical data                          |
| <input checked="" type="checkbox"/> | <input type="checkbox"/> Dual use research of concern           |
| <input checked="" type="checkbox"/> | <input type="checkbox"/> Plants                                 |

## Methods

|                                     |                                                 |
|-------------------------------------|-------------------------------------------------|
| n/a                                 | Involved in the study                           |
| <input checked="" type="checkbox"/> | <input type="checkbox"/> ChIP-seq               |
| <input checked="" type="checkbox"/> | <input type="checkbox"/> Flow cytometry         |
| <input checked="" type="checkbox"/> | <input type="checkbox"/> MRI-based neuroimaging |

## Antibodies

|                 |                                                                                                                                                                                                                                                                                                                                                                                                                                                                                                                                                                                                                                                                                                                                                                                                                                                                                                                                                                                                                                             |
|-----------------|---------------------------------------------------------------------------------------------------------------------------------------------------------------------------------------------------------------------------------------------------------------------------------------------------------------------------------------------------------------------------------------------------------------------------------------------------------------------------------------------------------------------------------------------------------------------------------------------------------------------------------------------------------------------------------------------------------------------------------------------------------------------------------------------------------------------------------------------------------------------------------------------------------------------------------------------------------------------------------------------------------------------------------------------|
| Antibodies used | Atrogin1 (AP2041, ECM Biosciences); UBR2 (NBP1-45243, Novus Biologicals); LC3 (NB100-2220, Novus Biologicals); MHC (MAB4470, R&D Systems); p38 (9212C, Cell Signaling Technology); p-p38 (4511S, Cell Signaling Technology); NF-κB p65 (sc-8008, Santa Cruz Biotechnology); p-NF-κB p65 (3033T Cell Signaling Technology); α-tubulin (12G610, Developmental Studies Hybridoma Bank); Hsp70 (ADI-SPA810-F, Enzo Life Sciences); Hsp90 (ADI-SPA830-F, Enzo Life Sciences); TSG101 (NB200-112, Novus Biologicals); CD63 (sc-5275, Santa Cruz Biotechnology); CD81 (sc-166029, Santa Cruz Biotechnology); AchE (sc-373901, Santa Cruz Biotechnology); Cytochrome C (4272, Cell Signaling Technology); Rab27a (69295, Cell Signaling Technology); Rab27b (A10389, ABclonal Technology). All antibody information is provided in Supplementary Table 1.                                                                                                                                                                                           |
| Validation      | All commercially bought antibodies were tested and validated. Atrogin1 (doi: 10.1038/s41467-017-00726-x); UBR2 (doi: 10.1038/s41467-017-00726-x); LC3 (doi: 10.1038/s41467-017-00726-x); MHC (doi: 10.1038/s41467-017-00726-x); p38 (doi: 10.1038/s41467-017-00726-x); p-p38 (doi: 10.1038/s41467-017-00726-x); NF-κB p65 (https://www.antibodypedia.com/gene/3557/RELA/antibody/11987/sc-8008); p-NF-κB p65 (https://www.antibodypedia.com/gene/3557/RELA/antibody/106237/3033); α-tubulin (10.1073/pnas.2200215119); Hsp70 (doi: 10.1038/s41467-017-00726-x); Hsp90 (doi: 10.1038/s41467-017-00726-x); TSG101 (https://www.antibodypedia.com/gene/1752/TSG101/antibody/66499/NB200-112); CD63 (doi: 10.1002/jev2.70012); CD81 (10.3390/biomedicines12112523); AchE (doi: 10.3390/molecules27165316); Cytochrome C (10.1038/s41419-023-05595-5); Rab27a (https://www.antibodypedia.com/gene/687/RAB27A/antibody/3370680/69295); Rab27b (doi: 10.1007/s00395-017-0628-z). Validation information will be provided in Supplementary Table 1. |

## Eukaryotic cell lines

Policy information about [cell lines and Sex and Gender in Research](#)

|                                                                   |                                                                                                                                                                                                           |
|-------------------------------------------------------------------|-----------------------------------------------------------------------------------------------------------------------------------------------------------------------------------------------------------|
| Cell line source(s)                                               | C2C12, EL4 and NL20 cells were obtained from ATCC. LLC and C26 cells were obtained from National Cancer Institute. KPC cells were a gift from Elizabeth Jaffee (Johns Hopkins University, Baltimore, MD). |
| Authentication                                                    | Cell lines were verified according to the morphology by light microscope.                                                                                                                                 |
| Mycoplasma contamination                                          | All cells were tested as free of mycoplasma.                                                                                                                                                              |
| Commonly misidentified lines (See <a href="#">ICLAC</a> register) | None                                                                                                                                                                                                      |

## Animals and other research organisms

Policy information about [studies involving animals](#); [ARRIVE guidelines](#) recommended for reporting animal research, and [Sex and Gender in Research](#)

|                         |                                                                                   |
|-------------------------|-----------------------------------------------------------------------------------|
| Laboratory animals      | Animal: mouse; Strain: C57BL/6J; age: 10-wk-old at the start of the intervention. |
| Wild animals            | None                                                                              |
| Reporting on sex        | Both sex were used and indicated in the legends and in methods.                   |
| Field-collected samples | N/A                                                                               |
| Ethics oversight        | Approved by institutional Animal Welfare Committee (AWC 24-0025)                  |

Note that full information on the approval of the study protocol must also be provided in the manuscript.

|                       |                                                                                                                                                                                                                                                                                                                                                                                                                                                                                                                                                   |
|-----------------------|---------------------------------------------------------------------------------------------------------------------------------------------------------------------------------------------------------------------------------------------------------------------------------------------------------------------------------------------------------------------------------------------------------------------------------------------------------------------------------------------------------------------------------------------------|
| Seed stocks           | Report on the source of all seed stocks or other plant material used. If applicable, state the seed stock centre and catalogue number. If plant specimens were collected from the field, describe the collection location, date and sampling procedures.                                                                                                                                                                                                                                                                                          |
| Novel plant genotypes | Describe the methods by which all novel plant genotypes were produced. This includes those generated by transgenic approaches, gene editing, chemical/radiation-based mutagenesis and hybridization. For transgenic lines, describe the transformation method, the number of independent lines analyzed and the generation upon which experiments were performed. For gene-edited lines, describe the editor used, the endogenous sequence targeted for editing, the targeting guide RNA sequence (if applicable) and how the editor was applied. |
| Authentication        | Describe any authentication procedures for each seed stock used or novel genotype generated. Describe any experiments used to assess the effect of a mutation and, where applicable, how potential secondary effects (e.g. second site T-DNA insertions, mosaicism, off-target gene editing) were examined.                                                                                                                                                                                                                                       |
